# Supplementary material
Source: PubMed Central journal article supplement (PMC10623540)
Supplement: NIHMS1939021-supplement-1.pdf [file NIHMS1939021-supplement-1.pdf]

## **ASSOCIATED CONTENT**

Supporting information including the supplementary figures and tables, characterization data and  $^1\text{H}/^{13}\text{C}$ -NMR spectra, and detailed experimental protocols is available free of charge via the Internet at <http://pubs.acs.org>.
